# Supplementary material
Source: Springer Nature journal article supplement (https://www.springermedizin.de/resource/supplementary/12879_2012_2171_MOESM3_ESM.pdf/9443840)

**A) Two-Way Sensitivity analysis (WTP \$0)**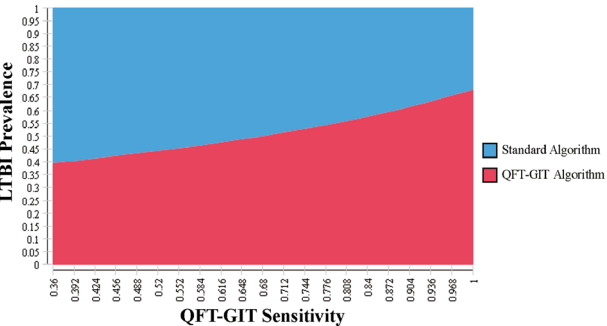**B) Two-Way Sensitivity analysis (WTP \$50,000)**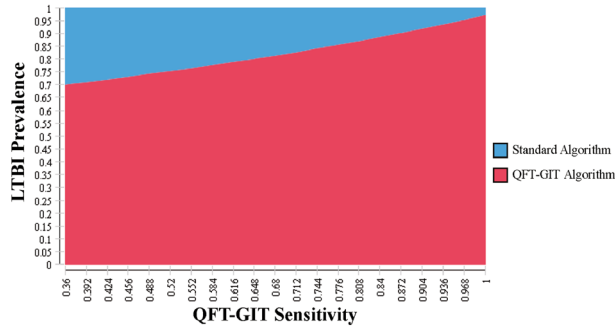

Supplement: MOESM3 [file 9443840]
